# Supplementary material for: A double core–shell modification of bulk TiO2 microspheres into porous N-doped-graphene carbon nanoflakes/N-doped TiO2 microspheres for lithium-ion battery anodes
Source: Royal Society of Chemistry journal article supplement (doi:10.1039/c5ra06573a), 2015-01-01
Supplement: c5ra06573a1.pdf [file c5ra06573a1.pdf]

## Supplementary information

A double core-shell modification of bulk TiO<sub>2</sub> microspheres into porous N-doped-graphene carbon nanoflakes/N-doped TiO<sub>2</sub> microspheres for lithium-ion battery anodes

Balasubramaniyan Rajagopalan, Eun-Suok Oh, Won Mook Choi, and Jin Suk Chung\*

School of Chemical Engineering, University of Ulsan, Namgu, Daehakro 93, Ulsan 680-749, Republic of Korea.

\*Corresponding author Tel: +82 52 259 2249 Fax: +82 52 259 1689

Description of the SEM-EDAX, FE-SEM, XRD, TGA, XPS, BET, and Raman analysis of the TiO<sub>2</sub> microsphere and surface modified TiO<sub>2</sub> microsphere nanocomposites.

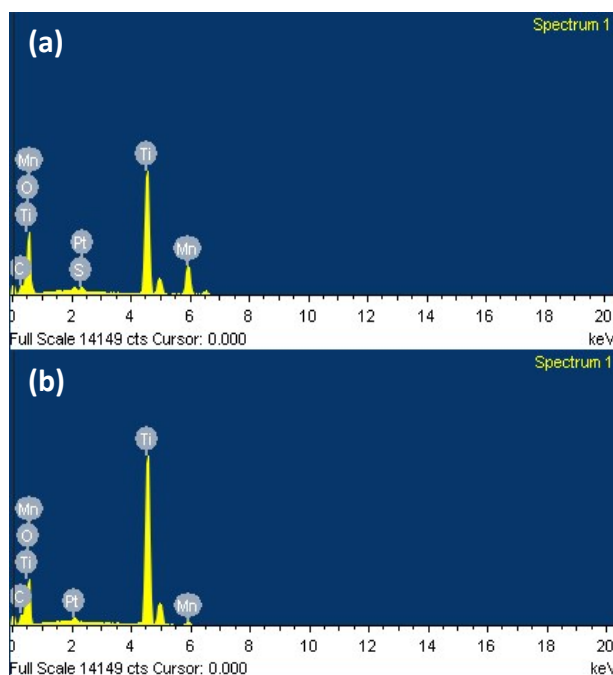

**Fig. S1** SEM-EDAX analysis of the (a) Mn<sub>3</sub>O<sub>4</sub>/TiO<sub>2</sub> and (b) PANI/TiO<sub>2</sub> nanocomposites.

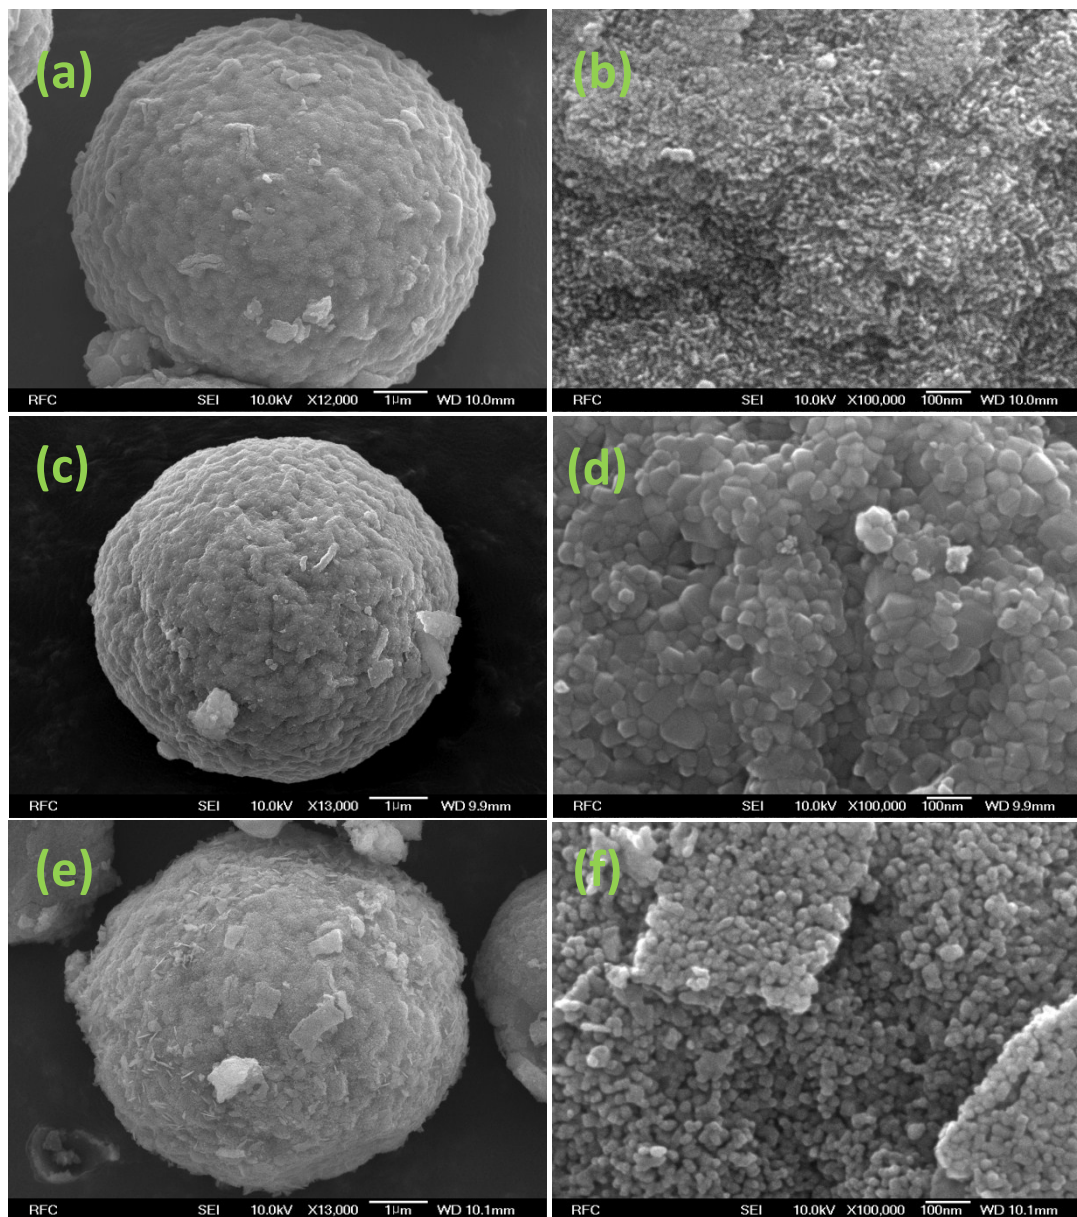

**Fig. S2** FE-SEM images of (a, b) Carbon/TiO<sub>2</sub>, (c, d) TiO<sub>2</sub>, and (e, f) NC/NTiO<sub>2</sub> after the calcination under the air atmosphere.

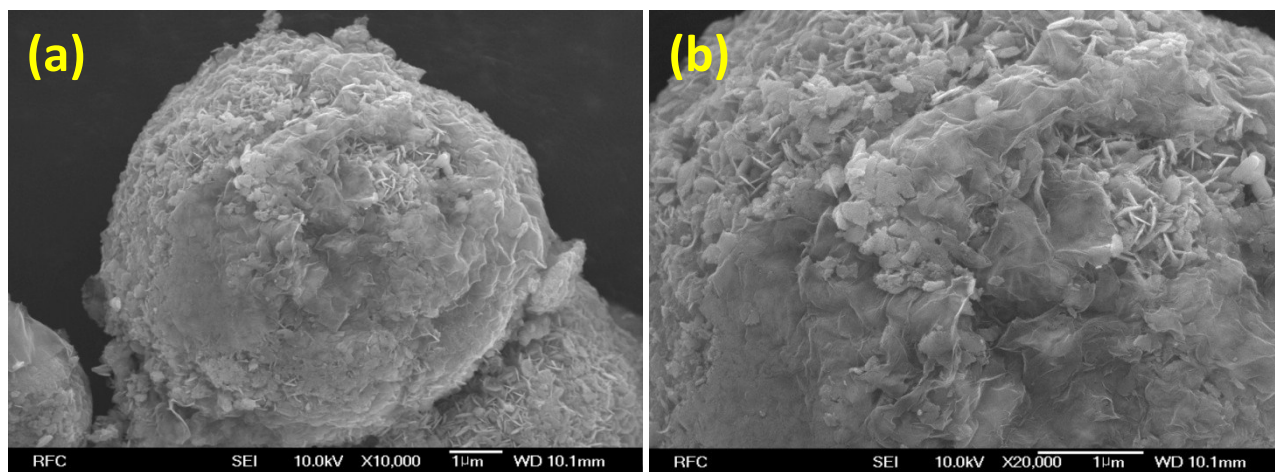

**Fig. S3** (a) RTNG-NC/NTiO<sub>2</sub> nanocomposite, which is partially covered by NG sheets, and (b) higher magnification of (a).

**Table S1** The calculation of particle diameter from XRD by using scherrer equation.

| Nanocomposites            | Pos. [ $^{\circ}2\theta$ .] | Theta  | FWHM Left [ $^{\circ}2\theta$ .] | FWHM in radian | theta in radian | COS Theta in radian | D (nm)   |
|---------------------------|-----------------------------|--------|----------------------------------|----------------|-----------------|---------------------|----------|
| TiO <sub>2</sub>          | 25.3                        | 12.65  | 0.186                            | 0.003245       | 0.220672        | 0.975751            | 47.66921 |
| Carbon/TiO <sub>2</sub>   | 25.27                       | 12.635 | 0.889                            | 0.015508       | 0.220411        | 0.975808            | 9.97295  |
| NC/NTiO <sub>2</sub>      | 25.3                        | 12.65  | 0.772                            | 0.013467       | 0.220672        | 0.975751            | 11.48507 |
| TNG-NC/NTiO <sub>2</sub>  | 25.29                       | 12.645 | 0.51                             | 0.008897       | 0.220585        | 0.97577             | 17.3849  |
| RTNG-NC/NTiO <sub>2</sub> | 25.26                       | 12.63  | 0.521                            | 0.009089       | 0.220323        | 0.975827            | 17.01685 |

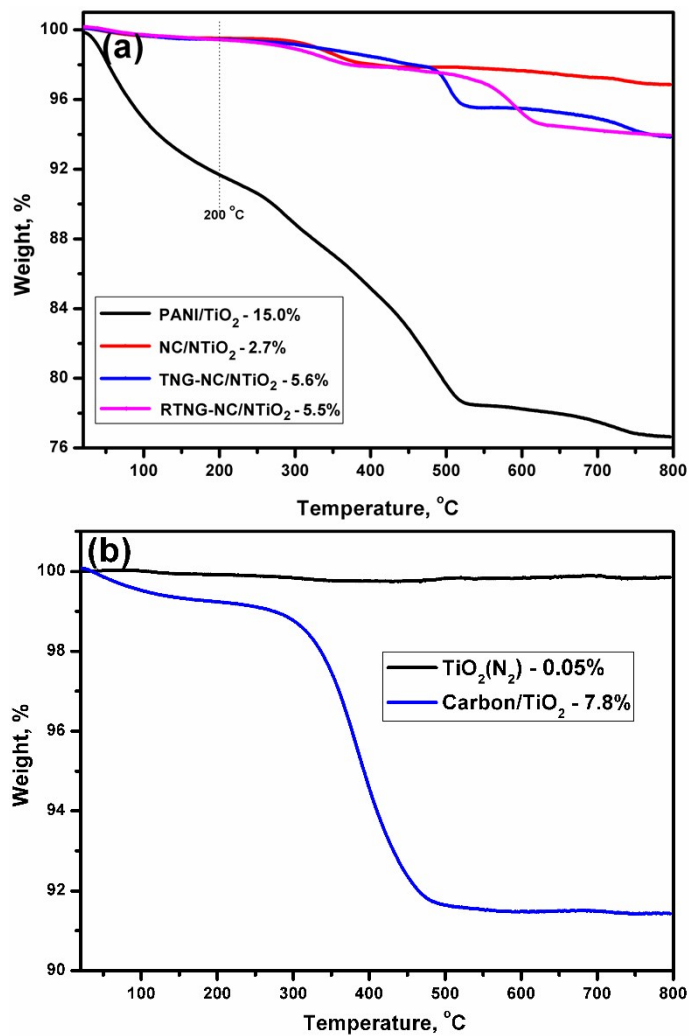

**Fig. S4** TGA of the (a) surface modified TiO<sub>2</sub> nanocomposites. (b) TGA of the TiO<sub>2</sub> (calcination of solvothermally reacted TiO<sub>2</sub> in N<sub>2</sub> atmosphere) and carbon/TiO<sub>2</sub> (calcination of titanium glycolate) nanocomposites.

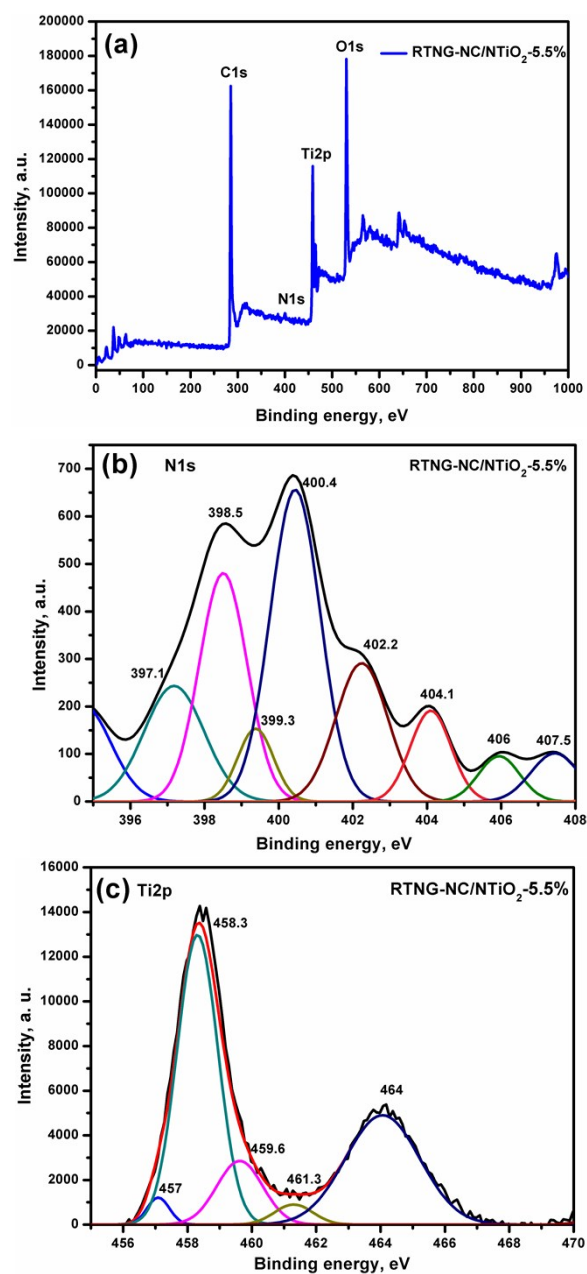

**Fig. S5** XPS (a) survey scan spectra, (b) N1 spectra, and (c) Ti2p analysis of the RTNG-NC/NTiO<sub>2</sub> nanocomposite.

**Table S2** The surface areas and pore volumes of the TiO<sub>2</sub> and its nanocomposites.

| Nanocomposites                  | Specific surface area<br>(m <sup>2</sup> g <sup>-1</sup> ) | Pore volume<br>(cm <sup>3</sup> g <sup>-1</sup> ) |
|---------------------------------|------------------------------------------------------------|---------------------------------------------------|
| TiO <sub>2</sub>                | 8.7                                                        | 0.04                                              |
| Carbon/TiO <sub>2</sub> -7.8%   | 82.3                                                       | 0.053                                             |
| NC/NTiO <sub>2</sub> -2.7%      | 45.6                                                       | 0.110                                             |
| TNG-NC/NTiO <sub>2</sub> -5.6%  | 34.7                                                       | 0.105                                             |
| RTNG-NC/NTiO <sub>2</sub> -5.6% | 59.1                                                       | 0.137                                             |

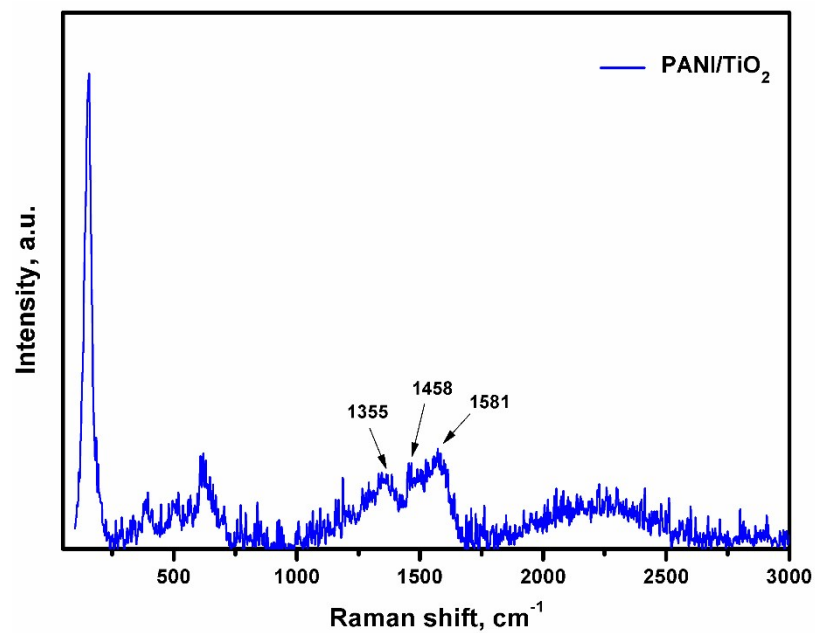

**Fig. S6** Raman spectroscopy of the PANI/TiO<sub>2</sub> nanocomposite.

As shown in Figure S6, the formation of peaks at 1355, 1458, 1581 cm<sup>-1</sup> are clearly indicating the presence of PANI on the PANI/TiO<sub>2</sub> nanocomposites (H. Wang, Q. Hao, X. Yang, L. Lu, and X. Wang, *ACS Appl. Mater. Interfaces*, 2010, **2**, 821-828).
